# Supplementary material for: SMALL PLANT AND ORGAN 1 (SPO1) Encoding a Cellulose Synthase-like Protein D4 (OsCSLD4) Is an Important Regulator for Plant Architecture and Organ Size in Rice
Source: MDPI journal article supplement (doi:10.3390/ijms242316974), 2023-11-30
Supplement: s1 [file s1]

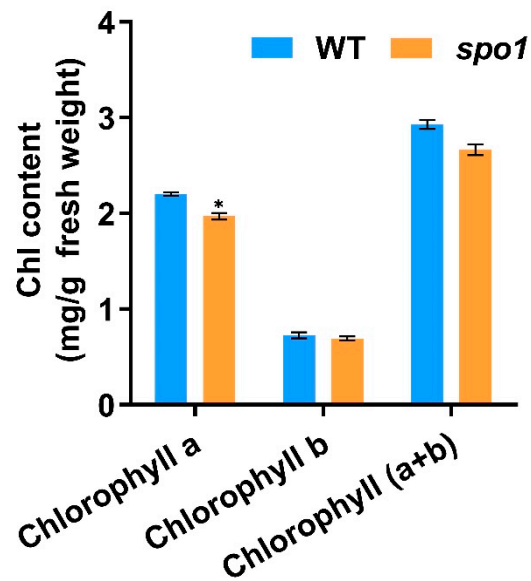

**Figure S1.** Characterization of pigment content of *spo1* mutant. The pigment contents of second leaf from the top at tillering stage. Pigment contents data are mean  $\pm$  SD (n = 4), asterisks indicate significant differences according to Student's t-test (\*P < 0.05).

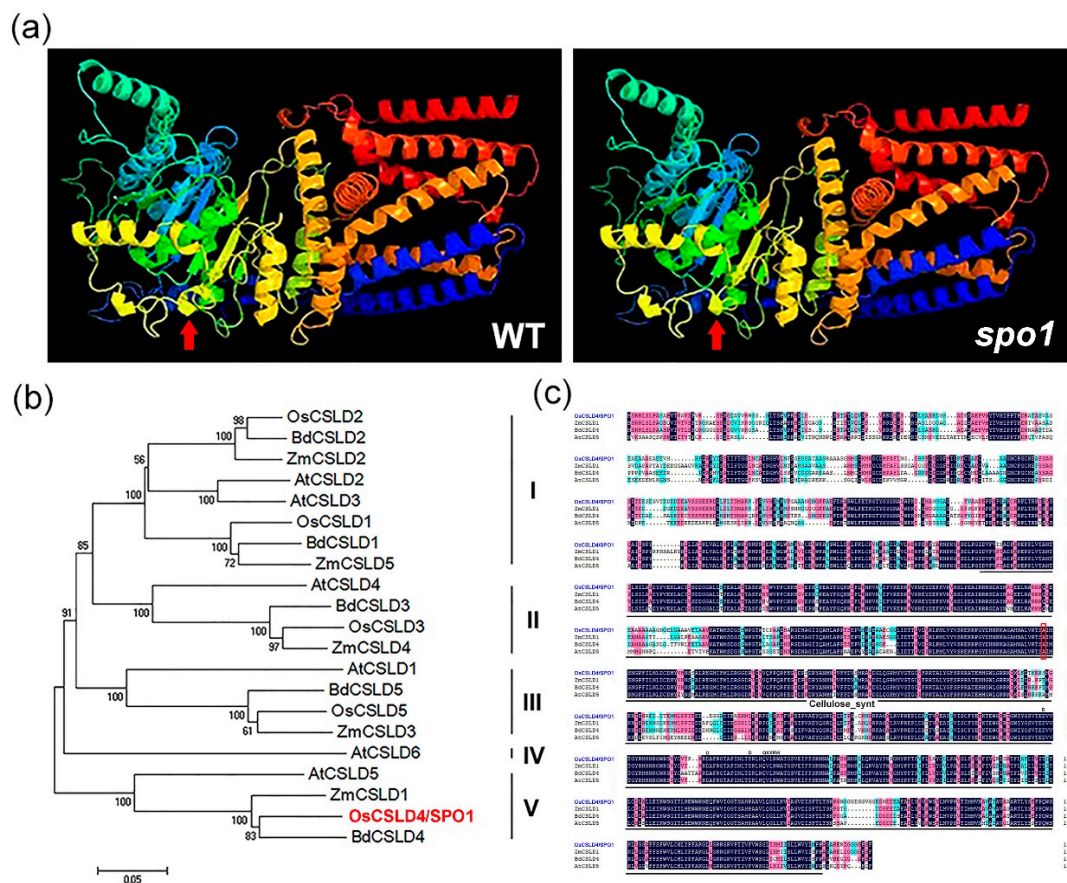

**Figure S2.** *SPO1* encodes a cellulose synthase-like protein D4. (a) The three-level structure prediction model of WT and *spo1* protein. The arrow is the position of the structural change. (b) Phylogenetic tree of *SPO1* and its highly similar proteins of CSLD family members among other species. Numbers at each node represent bootstrap support. The scale bar indicates the genetic distance based on branch length.

(c) Multiple sequences alignment of *Oryza sativa* Japonica Group SPO1/OsCSLD4 (Os12g0555600), BdCSLD4 (XP\_003575482.1), AtCSLD5 (NP\_171773.1), ZmCSLD1 (GRMZM2G015886). The amino acids showing identity are shaded dark blue, whereas similar amino acids are pink and light blue. The conserved D, D, D, QXXRW motifs are labelled. The black horizontal line marked the Cellulose\_synt domain. The red box is marked with the *spo1* mutation site. The accession numbers of the CSLDs used in this study are AtCSLD1 (NP\_001324935.1), AtCSLD2 (NP\_197193.1), AtCSLD3 (NP\_186955.1), AtCSLD4 (NP\_195532.1), AtCSLD5 (NP\_171773.1), AtCSLD6 (NP\_174497.1), OsCSLD1 (XP\_015614304.1), OsCSLD2 (XP\_015643356.1), OsCSLD3 (XP\_015649263.1), SPO1/OsCSLD4 (Os12g0555600), OsCSLD5 (XP\_015642593.1), BdCSLD1 (XP\_024317796.1), BdCSLD2 (XP\_003557145.1), BdCSLD3 (XP\_003573792.1), BdCSLD4 (XP\_003575482.1), BdCSLD5 (XP\_003568676.1), ZmCSLD1 (GRMZM2G015886), ZmCSLD2 (GRMZM5G870176), ZmCSLD3 (GRMZM2G061764), ZmCSLD4 (GRMZM2G044269), ZmCSLD5 (GRMZM2G436299).

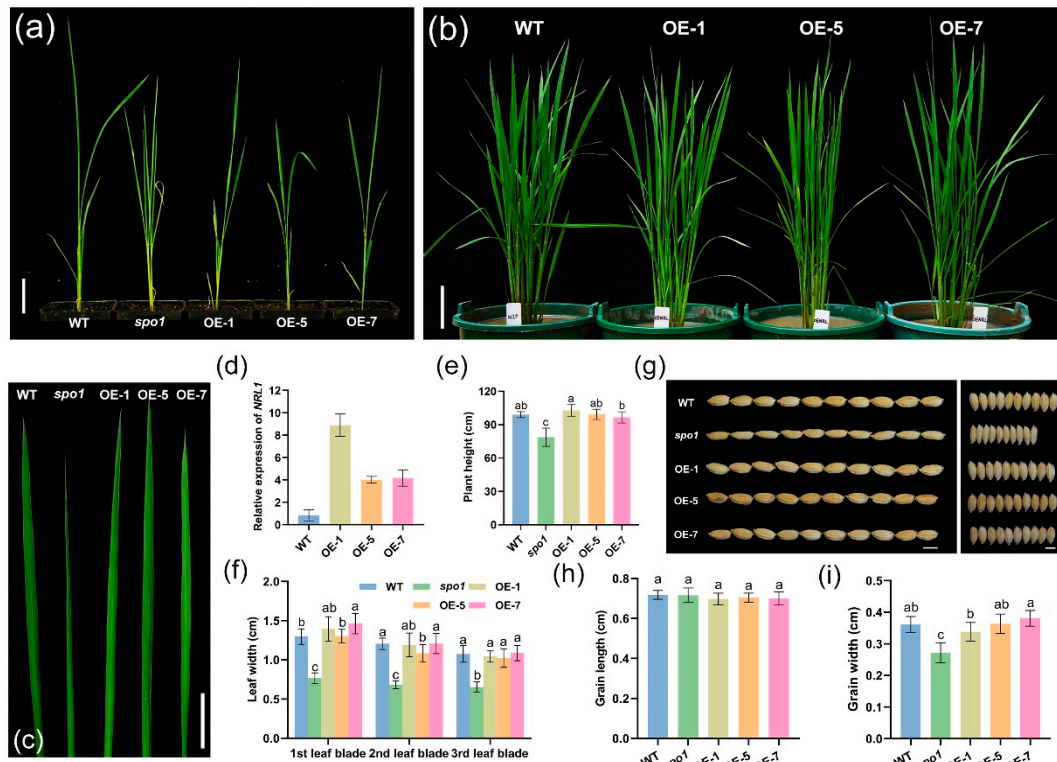

**Figure S3.** Characterization of overexpression (OE) plant morphology. (a) The seedlings of WT, *spo1*, OE-1, OE-5 and OE-7 plant. (b) Gross morphology of WT, OE-1, OE-5 and OE-7 plants at the tillering stage. (c) Morphology of the second leaf blades from top of WT, *spo1*, OE-1, OE-5 and OE-7 plants. (d) qRT-PCR analysis of the expression of *SPO1* in *spo1*. (e, f) Statistical analysis of plant height (e), the top three leaf blades width (f) among WT, *spo1*, OE-1, OE-5 and OE-7 plant at the mature stage. (g) Paddy rice grains of WT, *spo1*, OE-1, OE-5 and OE-7 plant. (h, i) Statistical analysis of seed length (h), seed width (i). Data presented are means ± SD; different letters indicate significant differences according to Duncan's multiple range test (5% α). Scale bars: (a) 5 cm; (b) 20 cm; (c) 5 cm; (d) 0.45cm (left) and 0.25cm (right).

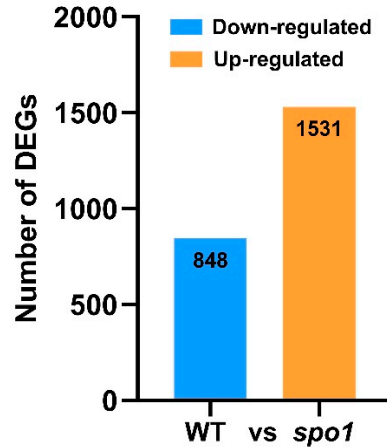

**Figure S4.** RNA-seq detected 2379 differentially expressed genes, of which 848 genes were downregulated, 1531 genes were significantly upregulated, fold change > 2, FDR < 0.05.

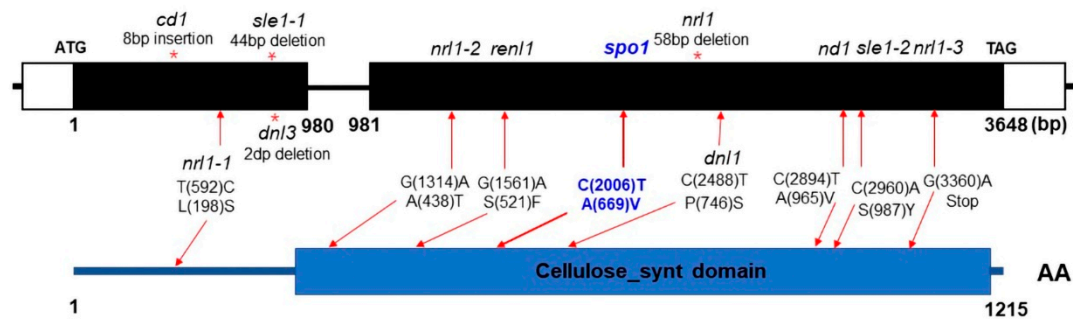

**Figure S5.** Comparative analysis of identified *OsCSLD4* allele mutation sites. The *OsCSLD4* gene structure and protein domain are shown above and below, respectively. The black box, black line, white box, and blue box represent exon, intron, UTR, and protein domain, respectively. Italics indicate *OsCSLD4* mutant alleles in previously studies. The blue font is a *spo1* mutant for this study. Asterisks represent the bases deletion or insertion and arrows represent single base substitution.

**Table S1.** The analysis of the potentially cis-elements in the promoter sequence

| Motif       | Distance | Sequence   | Function                            |
|-------------|----------|------------|-------------------------------------|
| ABRE        | -1215(+) | CACGTG     | cis-acting element involved in the  |
|             | -312(-)  | ACGTG      | abscisic acid responsiveness        |
| CGTCA-motif | -315(+)  | CGTCA      | cis-acting regulatory element       |
|             |          |            | involved in the MeJA responsiveness |
| TGACG-motif | -1392(-) | TGACG      | cis-acting regulatory element       |
|             | -311(-)  | TGACG      | involved in the MeJA responsiveness |
| LTR         | -63(-)   | CCGAAA     | cis-acting element involved in      |
|             |          |            | low-temperature responsiveness      |
| MBS         | -1072(-) | CAACTG     | MYB binding site involved in        |
|             |          |            | drought inducibility                |
| TATC-box    | -1647(+) | TATCCCA    | cis-acting element involved in      |
|             |          |            | gibberellin responsiveness          |
| TGA-element | -1496(+) | AACGAC     | auxin-responsive element            |
| MSA-like    | -478(+)  | CCAAACGGCT | cis-acting element involved in cell |
|             |          | ACTTCCATCT | cycle regulation                    |
|             |          | TCCACCC    |                                     |

**Table S2.** Summary of the primers used in this study.

| Primer name | Forward primer (5'→3')         | Reverse primer (5'→3')        | Purpose      |
|-------------|--------------------------------|-------------------------------|--------------|
| R12M10      | ATCATTTTCAGCCTGTGC<br>C        | AGCTTAATAGGGGGG<br>ACG        | Gene mapping |
| RM101       | GTGAATGGTCAAGTGAC<br>TTAGGTGGC | ACACAACATGTTCCCT<br>CCCATGC   |              |
| RM277       | CGGTCAAATCATCACCT<br>GAC       | CAAGGCTTGCAAGGG<br>AAG        |              |
| RM17        | TGCCCTGTTATTTTCTTC<br>TCTC     | GGTGATCCTTTCCCATT<br>TCA      |              |
| RM519       | AGAGAGCCCCTAAATTT<br>CCG       | AGGTACGCTCACCTGT<br>GGAC      |              |
| RM463       | TTCCCCTCCTTTTATGGT<br>GC       | TGTTCTCCTCAGTCACT<br>GCG      |              |
| RM28433     | AATAGCTGCATATACCC<br>GGTTGG    | TGTGTCTCTGATGATC<br>CGTTTCG   |              |
| RM28449     | CACCCATTGATGTGAAA<br>CTCTGG    | GGATTCATGATACAGT<br>GTGCAACG  |              |
| RM28460     | ACCGCACCACTACCTC<br>TGG        | TGCACAGCCCTATATA<br>GCAACTCC  |              |
| RM28465     | GCCTCGTAGAGACTCAA<br>ACTAAACG  | GTAGCTAGCCACCAAT<br>AGCATGG   |              |
| RM3726      | TACACCCACCCACATAC<br>GTCAGC    | GTCGTACTCCCGGATC<br>TTCTTCC   |              |
| RM6410      | GGAAGAAGCATCTGCA<br>GTAGTAGACG | GAATTAGCCGACAGC<br>GTCTTGG    |              |
| RM5479      | CTCACCATAGCAATCTC<br>CTGTGC    | ACTTCGTTCACTTGCA<br>TCATGG    |              |
| RM28637     | TCACATGTCATACGGCT<br>ACAGACC   | CACAATCACAGTGTGT<br>GCAAAGG   |              |
| RM6411      | GTGAAGGCTGTACCATC<br>CAACG     | CGGGTATTGTCGGTGT<br>TCAGG     |              |
| R12M43      | CCGCCGAGAAGAAACA<br>AAG        | CCCAAGAACAGGATT<br>ACA        |              |
| RM235       | AGAAGCTAGGGCTAAC<br>GAAC       | TCACCTGGTCAGCCTC<br>TTTC      |              |
| RM28428     | AACTCCTCGACTTTCGC<br>GATATGACC | GCGGATGATTTCTCCG<br>GTAAATTGG |              |
| RM6217      | CGCAGATGGAGATTCTT<br>GAAGG     | ACAGCAGCAAGAGCA<br>AGAAATCC   |              |
| RM28457     | TTAGCTAGCCACTACCA<br>AGAGAGG   | GTCCTTTCGACAGTAC<br>ATCTGG    |              |
| RM28451     | TGAGTTCGAGTTCGATT<br>TCTCG     | TCCTTCAAGAATCTCC<br>ATCTGC    |              |
| RM28456     | TGTACACTCACCTTCGC<br>TTCTCC    | CCTCTCTTCGTTCTGGA<br>GTCTGG   |              |
| RM28621     | GTGTCAACTGTCAACAA<br>ACACC     | AAGGTCAGGGTTACAT<br>GATAGG    |              |
| RM28610     | GAGTAAGTTCCTGCTTC<br>TGTTTGC   | GTCGAAGCTTTCATCT<br>CTATCTCC  |              |

|                            |                                 |                                 |                             |
|----------------------------|---------------------------------|---------------------------------|-----------------------------|
| Pun- <i>SPO1</i>           | CGGGATCCATGTCGCGG<br>CGGCTGTCGT | CGAGCTCCTATGGGAA<br>GCTGAATCCGC | Transformation<br>construct |
| P35s- <i>SPO1</i> -<br>GFP | GCTCTAGAATGTCGCGG<br>CGGCTGTCGT | CGGGATCCTGGGAAG<br>CTGAATCCGCCG |                             |
| q <i>OsActin1</i>          | GTGGTCGCCCCCTCCTGA<br>AAG       | GGCTTAGCATTCTTGG<br>GTCCG       | qRT-PCR                     |
| q <i>SPO1</i>              | CAGCGTCTCCCAAGCCA<br>TTC        | CCACCGACATCGCCCA<br>CAG         |                             |
| q <i>NAL1</i>              | ACATTGGGGATGTCAAG<br>GTTAT      | ACATTGGGGATGTCAA<br>GGTTAT      |                             |
| q <i>NAL7</i>              | ATCGTAGAGTTCTTCAC<br>CAT        | CCAGATAAGCAGGCA<br>GTA          |                             |
| q <i>NRL2</i>              | TCCCTTTCTTTTGATGAG<br>GA        | GCTACATGTAACGCCG<br>ATTC        |                             |
| q <i>ACL1</i>              | CTGAAGCTGAACCTCTC<br>GCTG       | GGAGCATGACGTAGA<br>TGAAGCAG     |                             |
| q <i>ACL2</i>              | CTCGTGCCTGTCGTCGG<br>AG         | TCGGCGAGCATGACGT<br>AGAG        |                             |
| q <i>RL14</i>              | GAGGATGAACTACTATC<br>CACCG      | GTGCTCAACACTTCTG<br>AACTTT      |                             |
| q <i>OsZHD1</i>            | CAGGAGCAGAAGGACA<br>AGATG       | CGACGATGAGATCAA<br>ATGCATT      |                             |
| q <i>NAL9</i>              | TTTATGATTGCATGTCCT<br>GGAT      | TCTCACCGCCAGCAAG<br>TAT         |                             |
| q <i>SLL1</i>              | CAGCTCGCAGGTGTCCA<br>A          | CCTCCCTAGAGTGAAC<br>TCGAGACT    |                             |
| q <i>Roc5</i>              | CGCAAGAGGAAGAAGC<br>GATAC       | GCTCCAGTTGCGTCTT<br>CATC        |                             |
| q <i>RL9</i>               | ATTCTTGCAACATGGAC<br>GCC        | CATTAGCCTCTGTGAT<br>TGCC        |                             |
